# Supplementary material
Source: publisher figshare collection journal article supplement (https://frontiersin.figshare.com/ndownloader/files/14049365)
Supplement: Supplementary file [file 14049365]

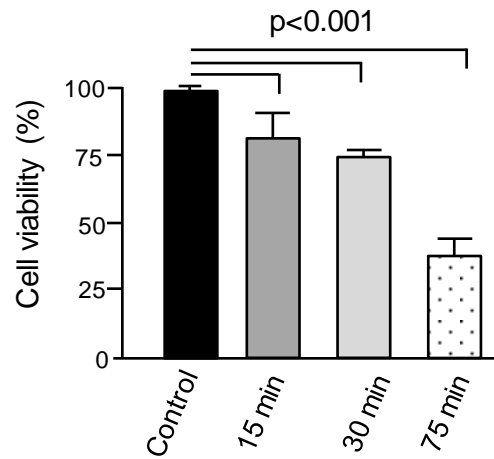

**Supplementary figure 2.** Cell viability of SW-480 cells after interaction with HMI-IMSS *E. histolytica* virulent trophozoites at time 0 (control), 15, 30 and 75 min measured by MTT assays.
